# Supplementary material for: Antibacterial and Biofilm Production Inhibition Activity of Thymus vulgaris L. Essential Oil against Salmonella spp. Isolates from Reptiles
Source: MDPI journal article supplement (doi:10.3390/pathogens12060804), 2023-06-05
Supplement: s1 [file s1]

## Supplementary files

**Table S1.** Gas chromatography with mass spectrometry (GC/MS) analysis for chemical composition evaluation of TEO.

| N  | Components                          | LRI  | AI   | <i>Thymus vulgaris</i> |       |
|----|-------------------------------------|------|------|------------------------|-------|
|    |                                     |      |      | Area $\pm$ SEM         | SI/MS |
| 1  | Ethyl propanoate                    | 714  | 714  | 0.10 $\pm$ 0.010       | 86    |
| 3  | cyclene                             | 920  | 919  | 0.13 $\pm$ 0.090       | 94    |
| 4  | $\alpha$ -pinene <sup>a</sup>       | 930  | 931  | 1.81 $\pm$ 0.100       | 95    |
| 5  | camphene <sup>a</sup>               | 952  | 952  | 1.89 $\pm$ 0.110       | 96    |
| 6  | $\beta$ -thujene                    | 968  | 968  | 0.71 $\pm$ 0.060       | 93    |
| 7  | mushroom alcohol                    | 975  | 975  | 0.37 $\pm$ 0.020       | 83    |
| 8  | $\beta$ -pinene <sup>a</sup>        | 982  | 980  | 0.56 $\pm$ 0.030       | 94    |
| 9  | $\beta$ -myrcene                    | 990  | 991  | 1.42 $\pm$ 0.080       | 86    |
| 10 | $\alpha$ -phellandrene <sup>a</sup> | 1002 | 1003 | 0.15 $\pm$ 0.010       | 91    |
| 11 | o-cymene                            | 1021 | 1021 | 19.64 $\pm$ 1.500      | 95    |
| 12 | eucalyptol <sup>a</sup>             | 1023 | 1023 | 0.89 $\pm$ 0.050       | 99    |
| 13 | limonene <sup>a</sup>               | 1030 | 1032 | 0.60 $\pm$ 0.040       | 91    |
| 14 | $\gamma$ -terpinene <sup>a</sup>    | 1062 | 1064 | 8.83 $\pm$ 1.030       | 94    |
| 15 | terpinolene                         | 1083 | 1085 | 1.33 $\pm$ 0.880       | 97    |
| 16 | $\beta$ -linalool <sup>a</sup>      | 1100 | 1101 | 4.07 $\pm$ 1.020       | 97    |
| 17 | camphor                             | 1145 | 1146 | 1.69 $\pm$ 0.850       | 98    |
| 18 | terpineol, cis- $\beta$ -           | 1147 | 1147 | 0.13 $\pm$ 0.010       | 90    |
| 19 | endo-borneol                        | 1166 | 1167 | 1.85 $\pm$ 0.700       | 97    |
| 20 | terpinen-4-ol                       | 1171 | 1171 | 1.83 $\pm$ 0.830       | 96    |
| 21 | $\alpha$ -terpineol                 | 1178 | 1179 | 0.12 $\pm$ 0.010       | 86    |
| 22 | anisole                             | 1234 | 1235 | 0.39 $\pm$ 0.060       | 90    |
| 23 | anisole, 2-isopropyl-4-methyl-      | 1244 | 1244 | 0.42 $\pm$ 0.050       | 94    |
| 24 | thymol <sup>a</sup>                 | 1290 | 1290 | 47.01 $\pm$ 3.320      | 94    |
| 25 | caryophyllene <sup>a</sup>          | 1415 | 1415 | 2.18 $\pm$ 0.870       | 99    |
| 26 | caryophyllene oxyde                 | 1596 | 1592 | 0.58 $\pm$ 0.030       | 91    |
|    | % Characterized                     | /    | /    | 98.70                  | /     |
|    | Others                              | /    | /    | 1.30                   | /     |

Legend. <sup>a</sup>: standard compounds. Linear retention index (LRI) on HP-5MS column was experimentally determined using a homologous series of C10-C40 alkanes standard mixture (Van den Dool and Kratz, 1993). Arithmetic index (AI) was taken from Adams (2007) and/or the NIST 2017 Database (NIST 17, 2017. Mass Spectral Library (NIST/EPA/NIH). Relative percentage values are means of three determinations with a structural equation modeling (SEM) in all cases below 10%.

**Table S2.** Antibiotic resistance and MIC values of the *Salmonella* strains isolated from reptiles (*Salmonella* 1–9).

| Antibiotic                                  | Breakpoints |       |       | S1       |         | S2       |         | S3       |         | S4       |         | S5       |         | S6       |         | S7       |         | S8       |         | S9       |         |
|---------------------------------------------|-------------|-------|-------|----------|---------|----------|---------|----------|---------|----------|---------|----------|---------|----------|---------|----------|---------|----------|---------|----------|---------|
|                                             | S           | I     | R     | MI<br>C^ | S/<br>R |
| Amikacin - AMI                              | 16          | 32    | 64    | <8       | S       |
| Piperacillin/Tazobactam                     | 16/4        | 32/4  | 128/4 | <8/4     | S       |
| Ticarcillin/Clavulanic acid constant 2-TIM2 | 16/2        | 32/2  | 128/2 | <8/2     | S       |
| Levofloxacin - LEVO                         | 0.5         | 1     | 2     | <1       | S       |
| Nitrofurantoin - NIT                        | 32          | 64    | 128   | <32      | S       |
| Tetracycline - TET                          | 4           | 8     | 16    | <4       | S       |
| Doripenem - DOR                             | 1           | 2     | 4     | <0.5     | S       |
| Minocycline - MIN                           | 4           | 8     | 16    | 2        | S       | 2        | S       | 2        | S       | 2        | S       | 2        | S       | 4        | S       | 4        | S       | 4        | S       | 2        | S       |
| Ertapenem - ETP                             | 0.5         | 1     | 2     | <0.25    | S       |
| Trimethoprim/Sulfamethoxazole -SXT          | 2/38        | -     | 4/76  | <2/30    | S       |
| Imipenem - IMI                              | 1           | 2     | 4     | <0.5     | S       |
| Piperacillin - PIP                          | 16          | 32–64 | 128   | <16      | S       |
| Meropenem - MERO                            | 1           | 2     | 4     | <0.5     | S       |
| Gentamicin - GEN                            | 4           | 8     | 16    | <2       | S       |
| Cefazolin - FAZ                             | 2           | 4     | 8     | 2        | S       | 2        | S       | 2        | S       | 2        | S       | 2        | S       | 2        | S       | 2        | S       | 5        | s       | 2        | S       |
| Tobramycin - TOB                            | 4           | 8     | 16    | <2       | S       |
| Ceftazidime - TAZ                           | 4           | 8     | 16    | <1       | S       |
| Ampicillin/Sulbactam                        | 8/4         | 16/8  | 32/16 | <4/2     | S       |
| Aztreonam - AZT                             | 4           | 8     | 16    | <1       | S       |
| Ampicillin - AMP                            | 8           | 16    | 32    | <8       | S       |
| Cefepime - FEP                              | 2           | 4–8   | 16    | <4       | S       |
| Ciprofloxacin - CIP                         | 0.25        | 0.5   | 1     | <0.5     | S       |
| Ceftriaxone - AXO                           | 1           | 2     | 4     | <0.5     | S       |

^µg/mL; S: Susceptible; I: Intermediate; R: Resistant.
